# Supplementary material for: EGFR Blockade Reverts Resistance to KRASG12C Inhibition in Colorectal Cancer
Source: Oxford University Press journal article supplement (doi:10.1158/2159-8290.cd-20-0187), 2020-05-19
Supplement: 21598290cd200187-sup-237620_2_supp_6252755_q998gq.xlsx [file 21598290cd200187-sup-237620_2_supp_6252755_q998gq.xlsx]

## Sheet: Pt-Derived samples
Supplementary Table 2: Patients-derived models characteristics
Patient ID	Cancer type	Primary location	Detailed histology	Stage at diagnosis	Age at diagnosis	Gender	Sample implanted	Sample type	Treatments before sample collection
CLR113a	Colorectal cancer	Cecum	Adenocarcinoma	4	58	M	Liver metastasis	Biopsy	FOLFOX, FOLFIRI/bevacizumb, TAS-102, regorafenib
CRC0051	Colorectal cancer	Sigmoid	Adenocarcinoma	3	55	F	Liver metastasis	Resection	FOLFOX
CRC1360	Colorectal cancer	Left Colon	Adenocarcinoma	3	58	M	Liver metastasis	Resection	FOLFIRI/bevacizumab
CRC1589	Colorectal cancer	Left Colon	Adenocarcinoma	3	55	M	Liver metastasis	Resection	FOLFIRI/bevacizumab
IRCC-107-A	Colorectal cancer	Right colon	Adenocarcinoma	1	75	F	Primary tumor	Resection	5FU
