# Supplementary material for: EGFR Blockade Reverts Resistance to KRASG12C Inhibition in Colorectal Cancer
Source: Oxford University Press journal article supplement (doi:10.1158/2159-8290.cd-20-0187), 2020-05-19
Supplement: 21598290cd200187-sup-237620_2_supp_6252756_q998gq.xlsx [file 21598290cd200187-sup-237620_2_supp_6252756_q998gq.xlsx]

## Sheet: Pt-derived models sequencing
Supplementary Table 3: Sequencing analyses of patient-derived models
Patient-derived Model	Genetic alterations	Sequencing method
CLR113a	KRAS G12C, PIK3CA E545K, APC T1556fs, TP53 R196Lfs*13, CBL G195W, ERG T180A, PRKN W183*, TP53BP1 M1095lfs*5, FLT1 A376V	MSK-Impact
CRC0051	KRAS G12C, TP53 R306*, TP53 Y234C, MAP2K4 P4L, AXIN2 S762N, SMAD4 H92Y, PTCH1 Q853R, SOX9 H380fs*4, CTNNB1 R18_T75delinsS	Targeted Next Generation Sequencing
CRC1360	KRAS G12C	Sanger
CRC1589	KRAS G12C	Sanger
IRCC-107-A	KRAS p.G12D, APC p.R1450*	Whole Genome Sequencing
